# Supplementary material for: Navigating fast and uniform zinc deposition via a versatile metal–organic complex interphase
Source: Royal Society of Chemistry journal article supplement (doi:10.1039/d2ee00209d), 2022-01-01
Supplement: d2ee00209d1.pdf [file d2ee00209d1.pdf]

## Supporting Information

### **Navigating fast and uniform zinc deposition via a versatile metal- organic complex interphase**

Huanyan Liu, Jian-Gan Wang\*, Wei Hua, Lingbo Ren, Huanhuan Sun, Zhidong Hou,

Yu Huyan, Yunjing Cao, Chunguang Wei, Feiyu Kang\*

## Experimental Section

*Synthesis of Zn-PA coated Zn anode (Zn-PA@Zn):* Firstly, 30  $\mu\text{L}$  of 70% phytic acid (PA) was injected to 30 ml of 2 to 1 mixed solution of deionized (DI) water and ethanol. After stirring for 5 min, the solution was transferred into a glass culture dish. Then, Zn plates with a diameter of 12 mm were putted into the solution and stand for several minutes. Zn-PA@Zn was obtained after being alternatively washed with DI water and ethanol. Ba-PA, Al-PA, and Sn-PA coordinated Zn anodes were prepared using the same procedure except for the adding of 30 mg of  $\text{BaCl}_2$ ,  $\text{Al}_2(\text{SO}_4)_3$ , and  $\text{SnCl}_4$ , respectively. Sn-Tannin (TA) coordinated Zn anode was prepared using the same procedure except for the change of PA to TA.

*Synthesis of  $\text{MnO}_2$ :* In a typical procedure, 2 mM of  $\text{KMnO}_4$  was dissolved in 50 mL of DI water under magnetic stirring for 15 min. Subsequently, 5 mL of 2 M  $\text{H}_2\text{SO}_4$  was added into the above solution. After stirring for another 15 min, 3 mM of Zn powders were added into the mixture. The reaction lasted for 2 h under continuous magnetic stirring at room temperature. Finally, the resulting precipitate was collected and washed with DI water and ethanol alternatively for three times.  $\text{MnO}_2$  powders were obtained after being dried in an oven at 80  $^\circ\text{C}$  for 12 h.

*Assembly of Zn/Zn symmetric cells and Zn/ $\text{MnO}_2$  cells:* CR2025-type coin symmetric cells were assembled with identical electrodes of bare Zn or Zn-PA@Zn (diameter: 12 mm, thickness: 80  $\mu\text{m}$ ), 2 M  $\text{ZnSO}_4$  electrolyte and glass fiber separators. Zn|| $\text{MnO}_2$  full cells were assembled by using pure Zn or Zn-PA@Zn as anodes, 2 M  $\text{ZnSO}_4$  as electrolyte and glass fiber as separators. All batteries were assembled in open air

conditions and aged for 12 hours before electrochemical measurements.

*Materials characterization:* The physical morphology was characterized by scanning electron microscopy (SEM, NanoSEM 450, FEI). X-ray diffractometer (XRD, X'Pert PRO MPD, Philips) was carried out to confirm the crystallographic structure of the products using Cu-K $\alpha$  as the radiation source ( $\lambda = 1.5418 \text{ \AA}$ ). The surface wettability of anodes was performed by OCA25 contact angle measuring system (Dataphysics, Germany). Fourier transform infrared (FTIR, ThermoNicolet iS50) and X-ray photoelectron spectroscopy (XPS, ESCALAB 250Xi, Thermo Scientific) were employed to analyze the element and surface chemistry of the samples.

*Electrochemical measurement:* The cycling and rate performance were measured on the Land Battery Testing System at room temperature. Solartron electrochemical workstation (1400 + 1470E, England) was employed to collect the cyclic voltammetry (CV), electrochemical impedance spectra (EIS), linear sweep voltammetry (LSV), and linear polarization curves. Specifically, CV curves were measured at a scan rate of  $0.1 \text{ mV s}^{-1}$  and EIS plots were tested in the frequency ranging from 100 kHz to 10 mHz with a perturbation amplitude of 5 mV. LSV and linear polarization curves were collected at the voltage range of  $-1.1 \sim -1.85 \text{ V}$  and  $-1.1 \sim -0.95 \text{ V}$ , respectively, with scan rate of  $5 \text{ mV s}^{-1}$ .

*Simulation of the Electric Field Contribution:* A simplified 2D electrodeposition model based on COMSOL was established to compare the proportional schematics of electric field distribution during cycling. The length of the entire model was set to  $8 \text{ }\mu\text{m}$ . The protuberance of Zn surface was represented by three semicircles with a

diameter of 1  $\mu\text{m}$  and a height of 1  $\mu\text{m}$ . In addition, there was a Zn-PA layer with a thickness of 1  $\mu\text{m}$  for Zn-PA@Zn electrodes on the basis of primary model. It was reported that the ionic conductivity of 2 M  $\text{ZnSO}_4$  electrolyte was  $\approx 5 \text{ S m}^{-1}$ .<sup>1</sup> The overpotential of 500 mV was employed as voltage excitation between the anode side and the electrolyte side.

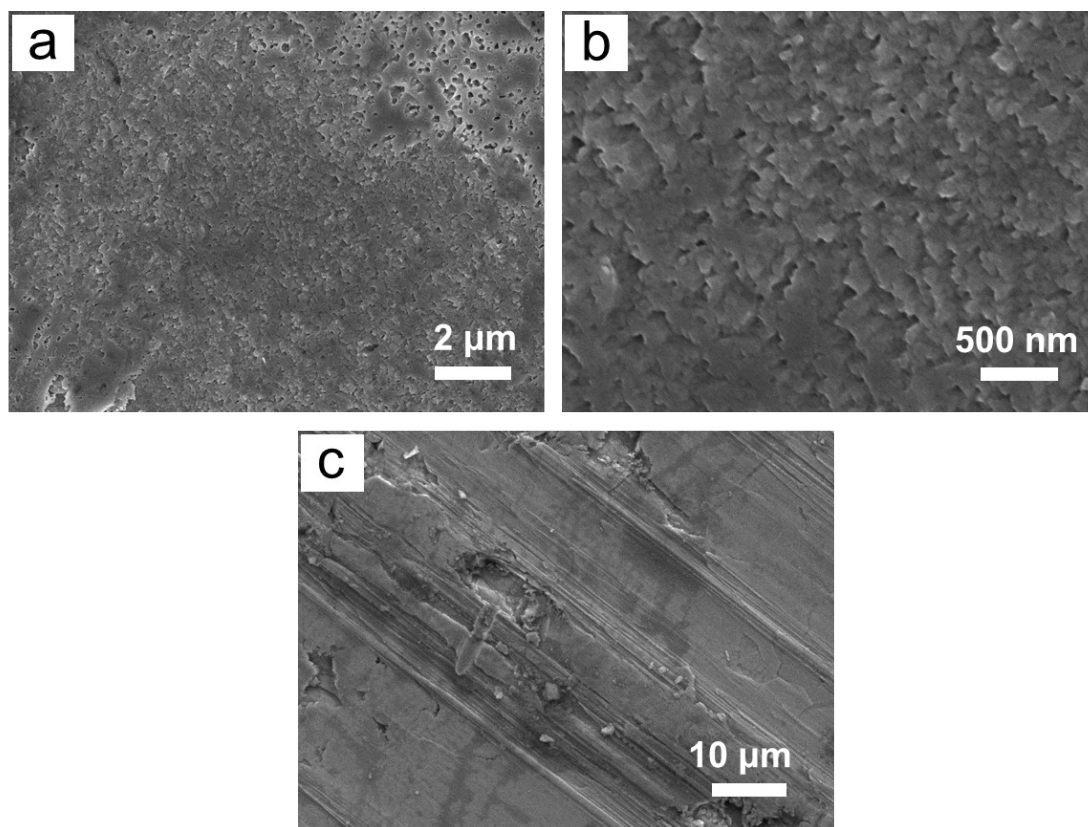

**Fig. S1** Top-view SEM images of (a, b) Zn-PA@Zn and (c) bare Zn anode.

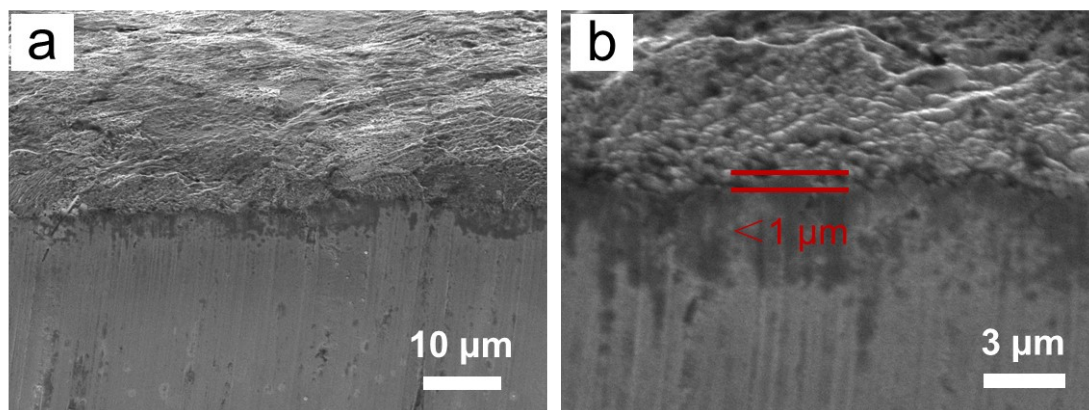

**Fig. S2** Cross-section SEM images of Zn-PA@Zn.

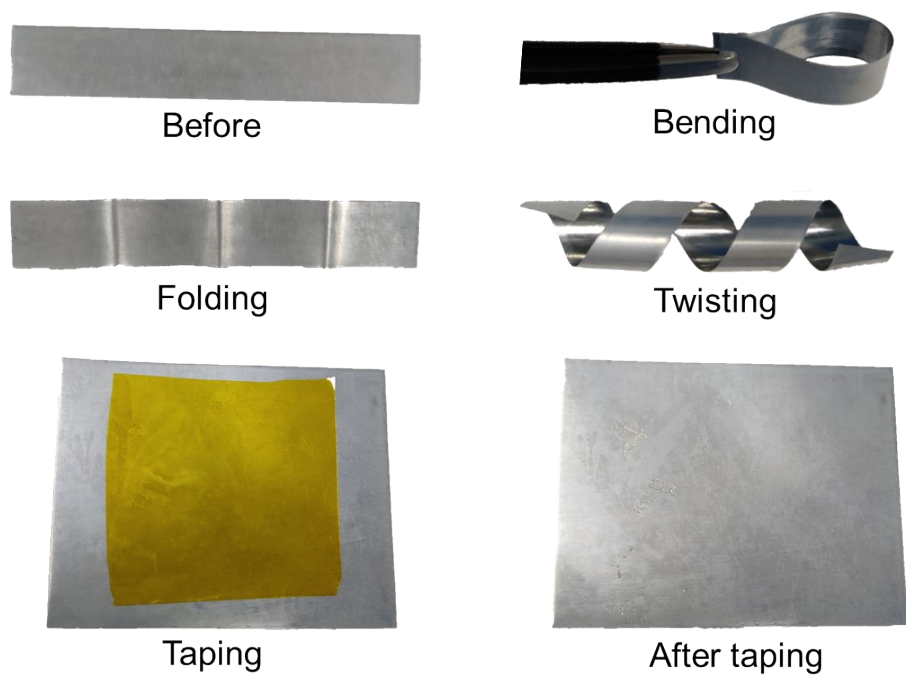

**Fig. S3** Optical images of Zn-PA@Zn anode under bending, folding, twisting, and even taping states.

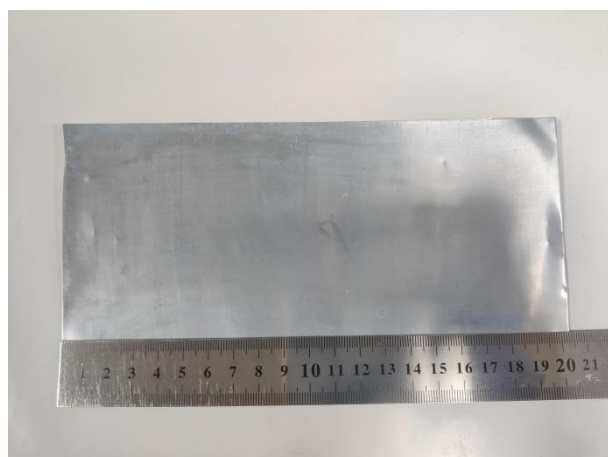

**Fig. S4** Optical image of the scale-up Zn-PA@Zn electrode.

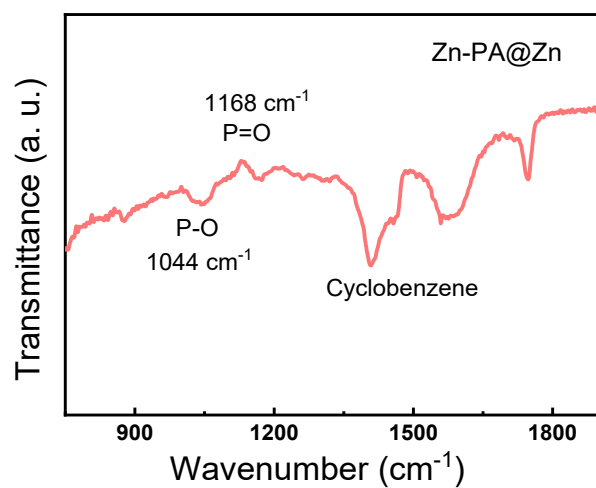

**Fig. S5** Fourier transform infrared (FTIR) curve of Zn-PA@Zn electrode.

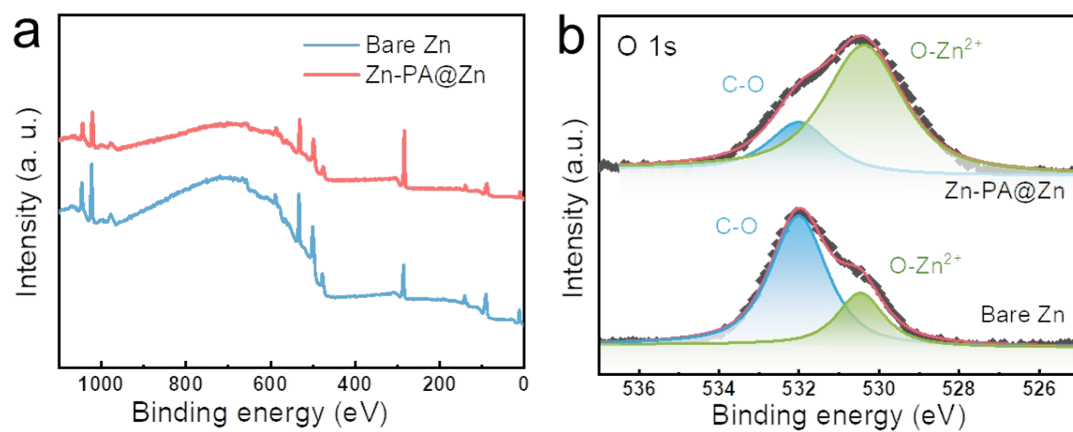

**Fig. S6** (a) Survey XPS profiles and (b) high-resolution O 1s XPS patterns of bare Zn and Zn-PA@Zn electrodes.

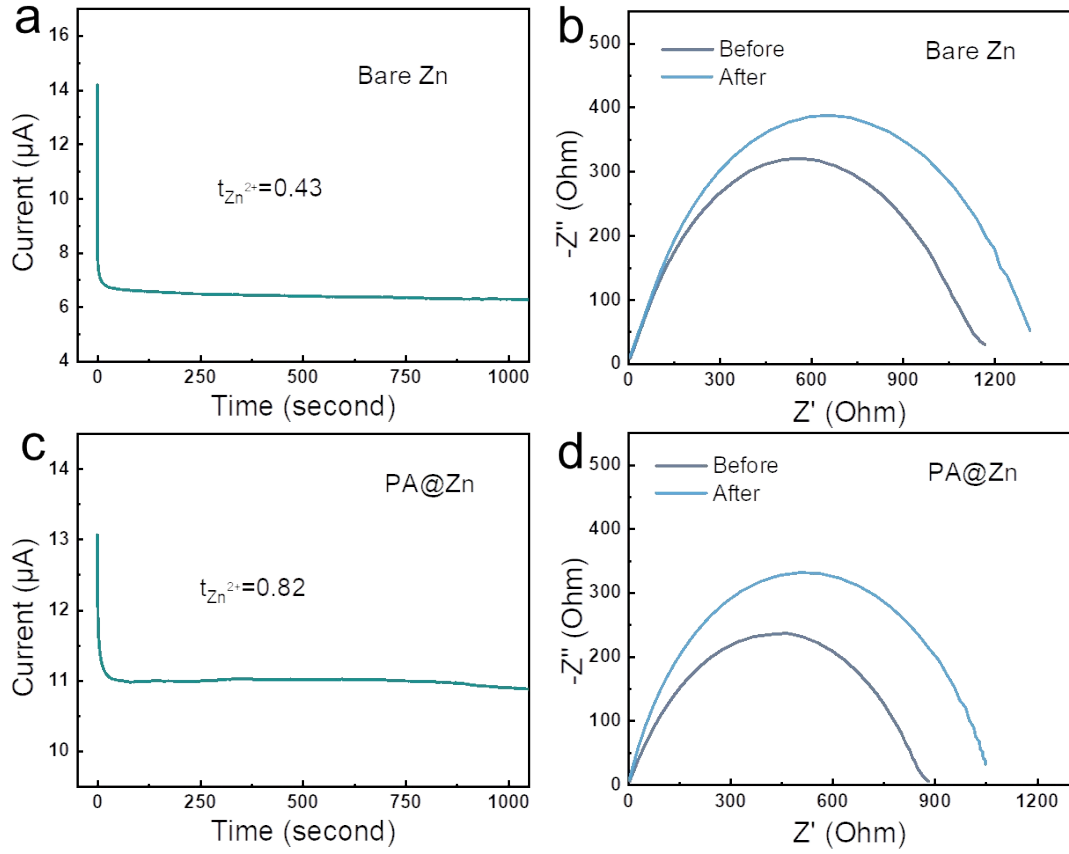

**Fig. S7** Current variation with time during polarization and the associated EIS curves of (a, b) bare Zn and (c, d) Zn-PA@Zn symmetrical cells with applied potential difference of 15 mV.

The  $Zn^{2+}$  transference number ( $t_{Zn^{2+}}$ ) was calculated according to the Bruce-Vincent method:

$$t_{Zn^{2+}} = \frac{I_s(V - I_0 R_0)}{I_0(V - I_s R_s)} \quad (1)$$

Where  $V$  is the applied potential (15 mV);  $I_0$  and  $R_0$  are the initial current and interface resistance, respectively;  $I_s$  and  $R_s$  represent the steady-state current and interface resistance, respectively. Therefore, the  $t_{Zn^{2+}}$  value in Zn-PA@Zn system can be calculated to 0.82, whereas the value in bare Zn system is only 0.43.

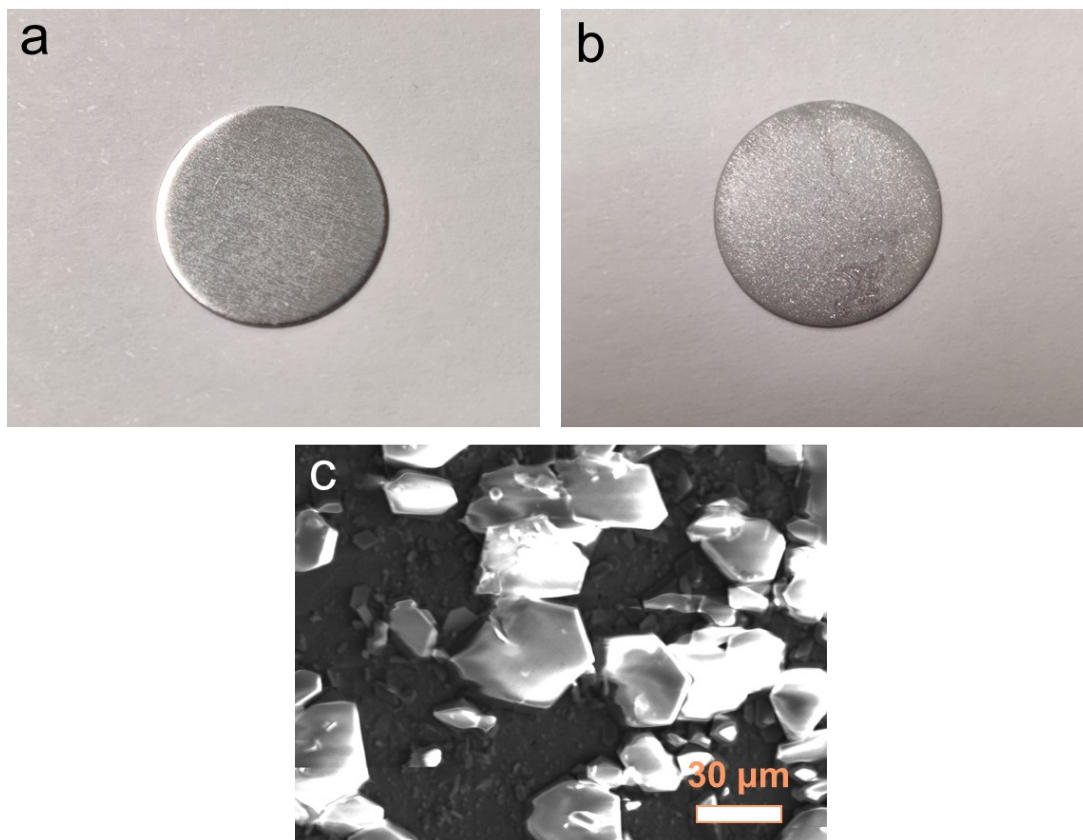

**Fig. S8** Optical images of bare Zn (a) before and (b) after immersing in 2 M ZnSO<sub>4</sub> for 10 days. (c)

Magnified SEM image of bare Zn after immersing in 2 M ZnSO<sub>4</sub> for 10 days.

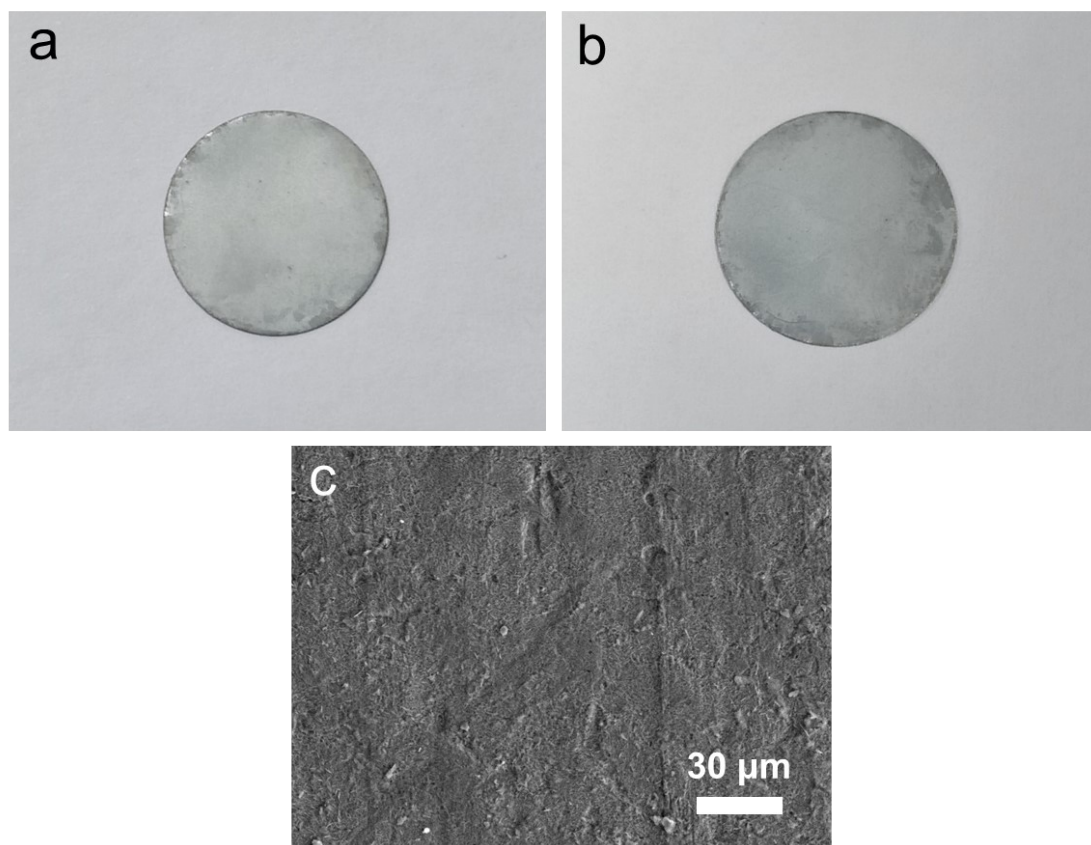

**Fig. S9** Optical images of Zn-PA@Zn (a) before and (b) after immersing in 2 M ZnSO<sub>4</sub> for 10 days. (c) Magnified SEM image of Zn-PA@Zn after immersing in 2 M ZnSO<sub>4</sub> for 10 days.

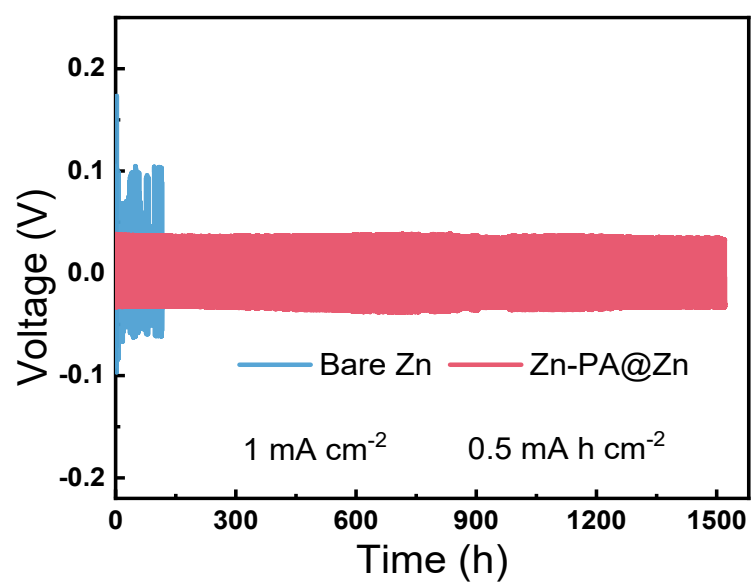

**Fig. S10** Cycling performance of bare Zn and Zn-PA@Zn symmetric cells at  $1 \text{ mA cm}^{-2}$ .

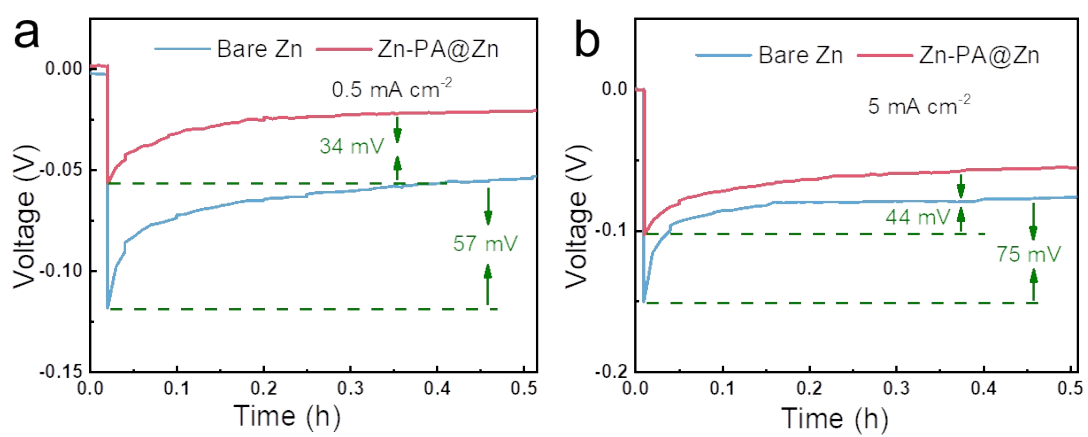

**Fig. S11** Nucleation overpotential of bare Zn and Zn-PA@Zn symmetric cells at (a)  $0.5 \text{ mA cm}^{-2}$  and (b)  $5 \text{ mA cm}^{-2}$ .

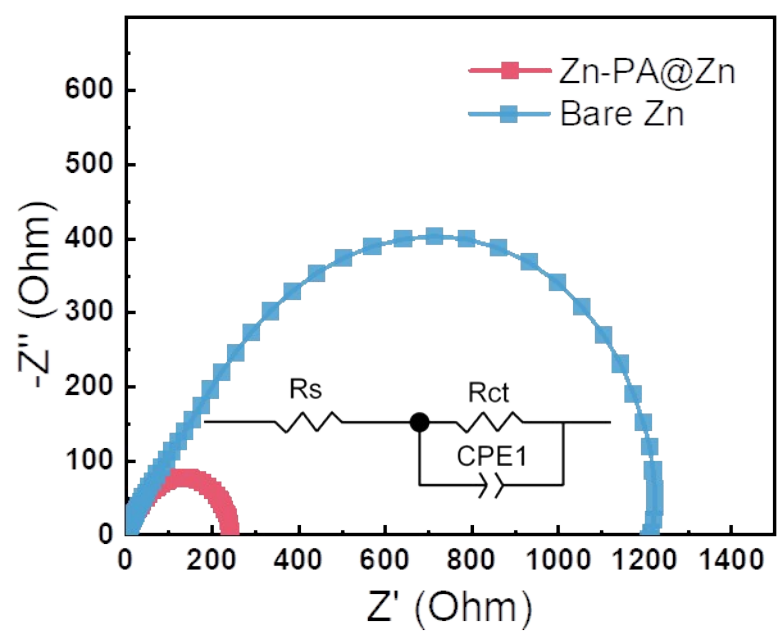

**Fig. S12** EIS curves of the Zn-PA@Zn and bare Zn symmetric cells.

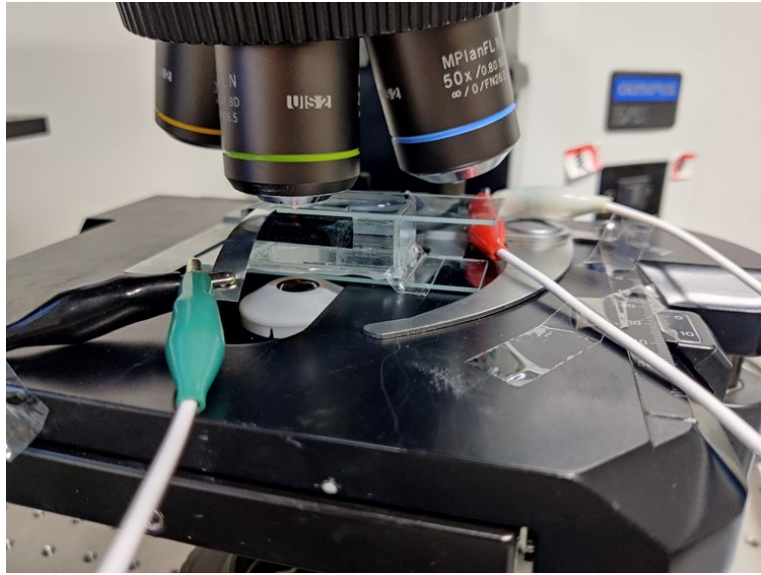

**Fig. S13** Self-made symmetric cell model for in-situ optical microscope.

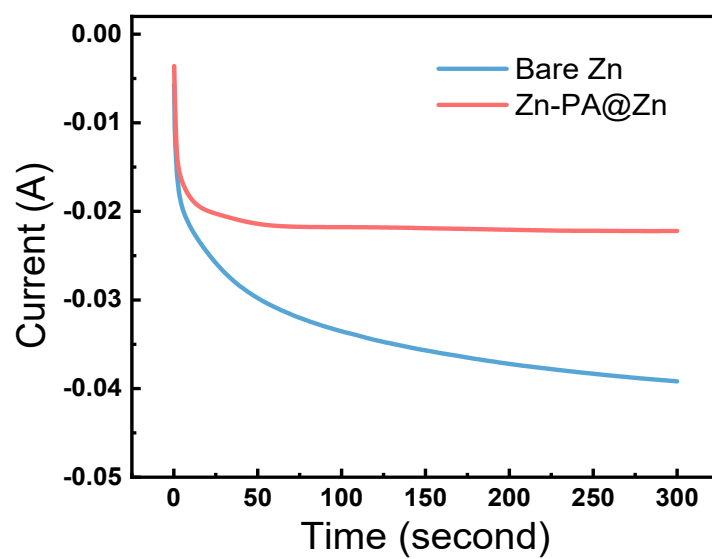

**Fig. S14** Chronoamperometry curves of bare Zn and Zn-PA@Zn at an overpotential of -150 mV.

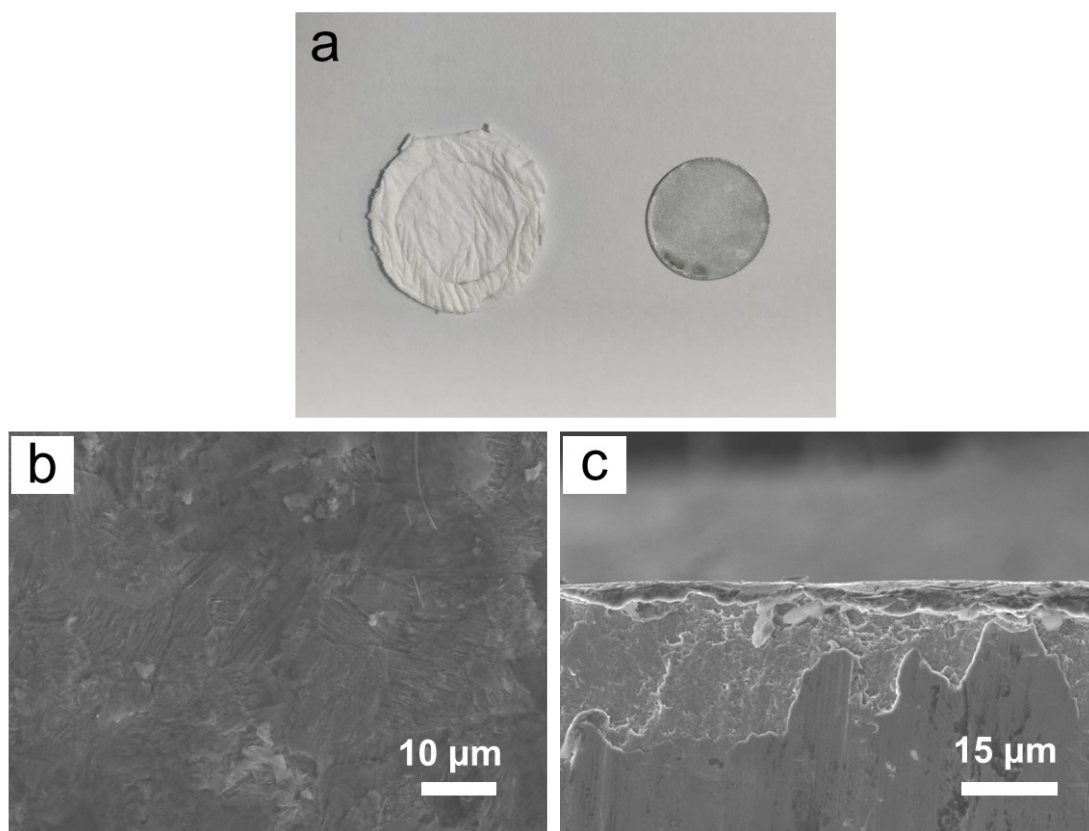

**Fig. S15** (a) Detached Zn-PA@Zn cell after 50 cycles at  $1 \text{ mA cm}^{-2}$  and  $0.5 \text{ mAh cm}^{-2}$ . (b) Top-view, and (c) cross-section SEM images of Zn-PA@Zn.

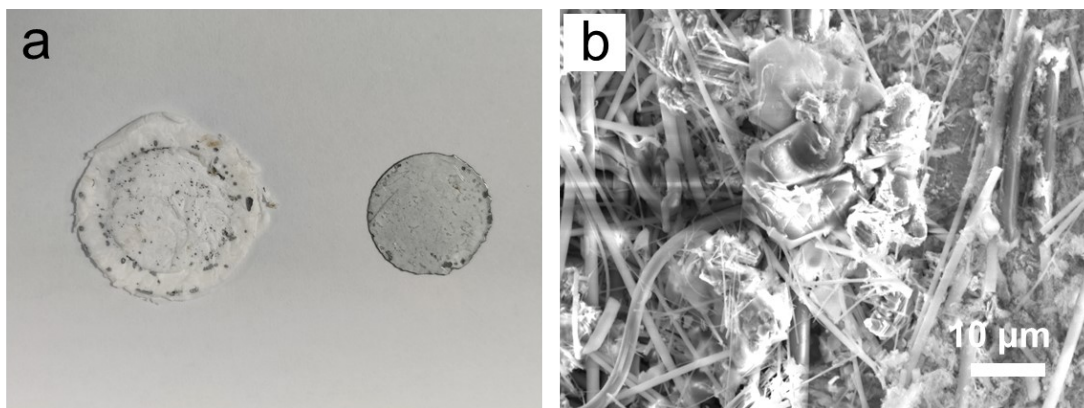

**Fig. S16** (a) Detached bare Zn cell after 50 cycles at  $1 \text{ mA cm}^{-2}$  and  $0.5 \text{ mAh cm}^{-2}$ . (b) SEM image of bare Zn electrode after cycling.

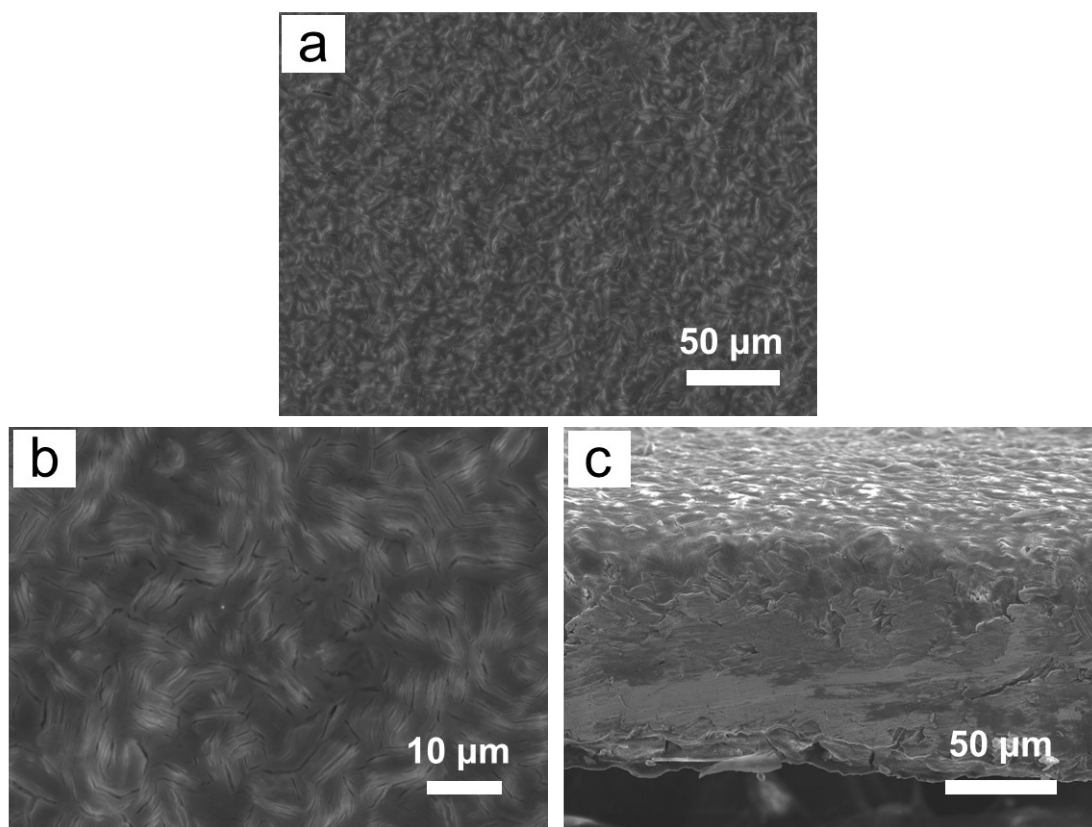

**Fig. S17** (a, b) Top-view, and (c) cross-section SEM images of Zn-PA@Zn after plating for 10 mAh cm<sup>-2</sup> at 10 mA cm<sup>-2</sup>.

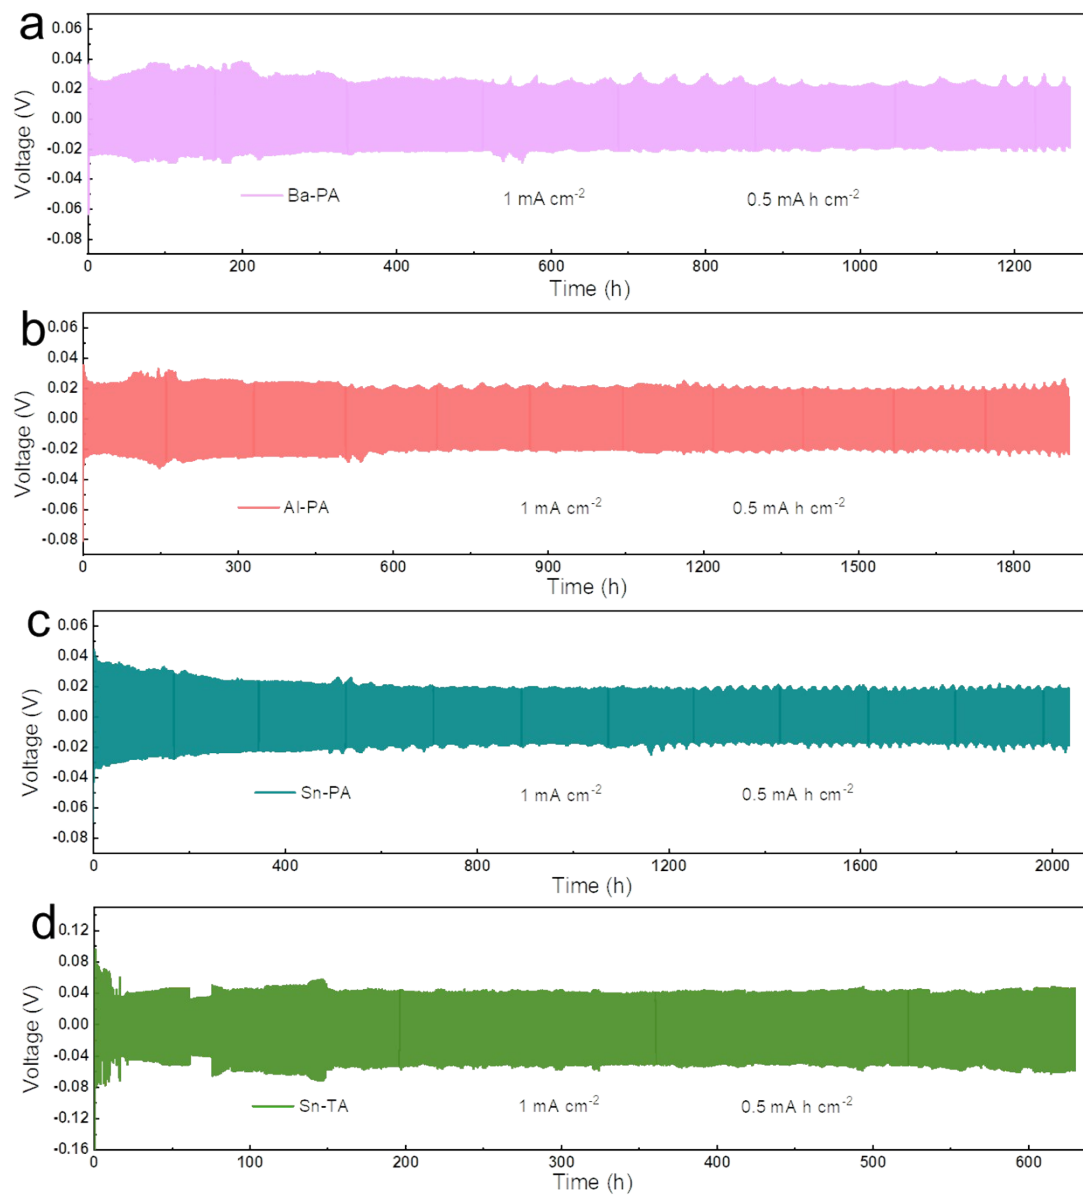

**Fig. S18** Cycling performance of the as-prepared (a) Ba-PA@Zn, (b) Al-PA@Zn, (c) Sn-PA@Zn, and Sn-TA@Zn symmetric cells at  $1 \text{ mA cm}^{-2}$ .

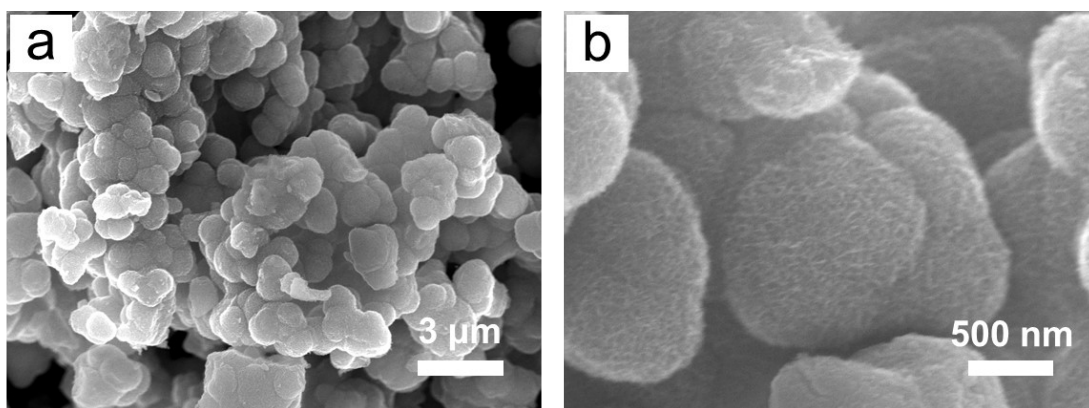

**Fig. S19** SEM images of the MnO<sub>2</sub> sample.

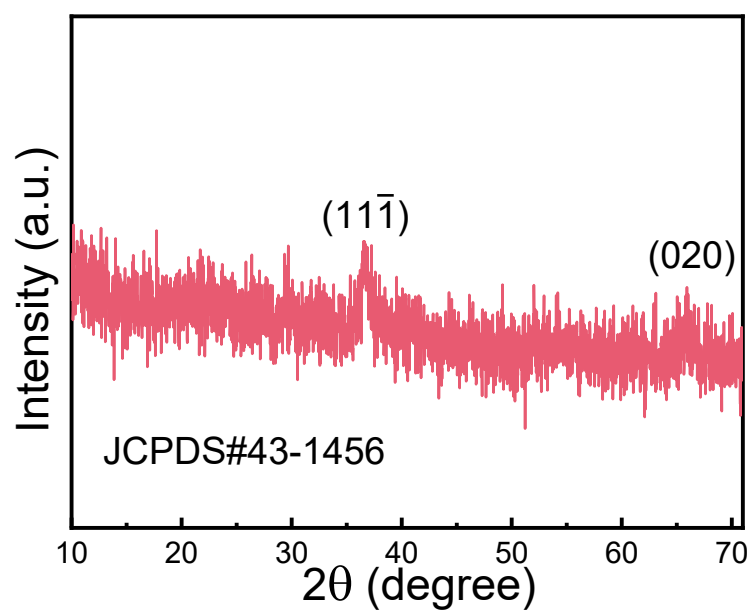

**Fig. S20** XRD pattern of the as-prepared MnO<sub>2</sub>.

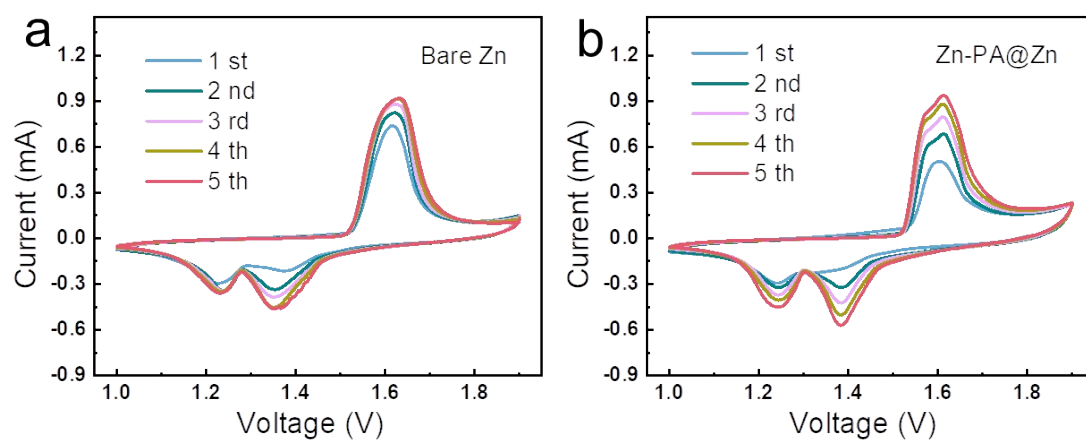

**Fig. S21** CV curves of (a) bare Zn||MnO<sub>2</sub> and (b) Zn-PA@Zn||MnO<sub>2</sub> cells at a scan rate of 0.1 mV

s<sup>-1</sup>.

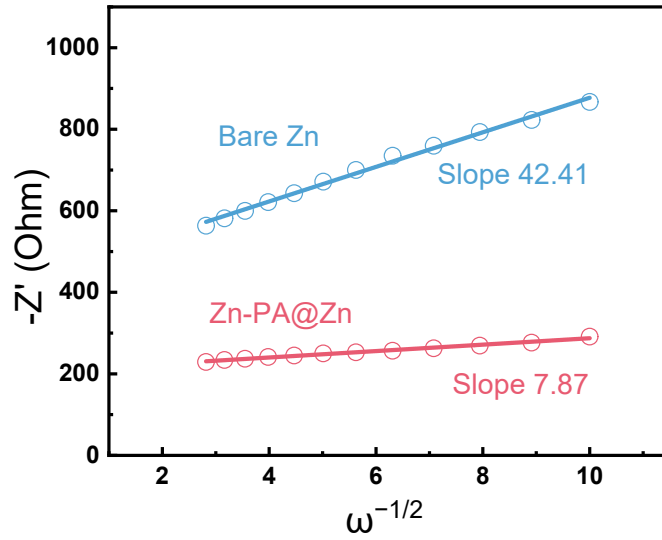

**Fig. S22**  $Z' \sim \omega^{-1/2}$  fitting curves of the full cells based on EIS results.

The  $\text{Zn}^{2+}$  diffusion coefficient ( $D$ ) was calculated according to  $D = 0.5R^2T^2n^4F^{-4}A^{-2}C^{-2}\sigma^{-2}$ . Here,  $R$  is the gas constant,  $T$  is the room temperature,  $n$  is the transfer number of the electrons during the  $\text{Zn}^{2+}$  reaction,  $F$  is the Faraday constant,  $A$  is the surface area of the electrode,  $C$  is the concentration of  $\text{Li}^+$ ,  $\sigma$  is the slope obtained from the  $Z' \sim \omega^{-1/2}$  line. Thus the  $D$  value of  $\text{Zn-PA@Zn}||\text{MnO}_2$  cell was calculated to be  $6.99 \times 10^{-10} \text{ cm}^2 \text{ s}^{-1}$ , whereas the value for bare  $\text{Zn}||\text{MnO}_2$  cell was  $2.41 \times 10^{-11} \text{ cm}^2 \text{ s}^{-1}$ .

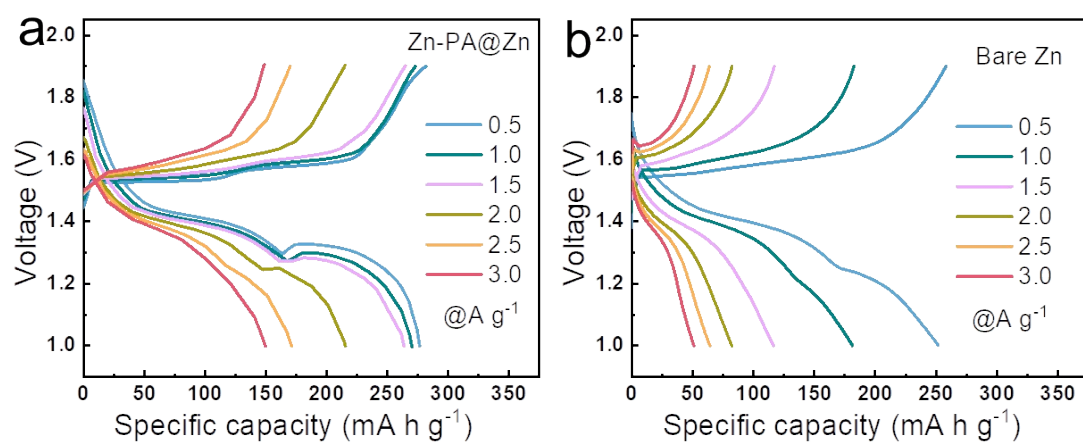

**Fig. S23** Charge-discharge profiles of (a) Zn-PA@Zn||MnO<sub>2</sub> and (b) bare Zn||MnO<sub>2</sub> cells at

different current densities.

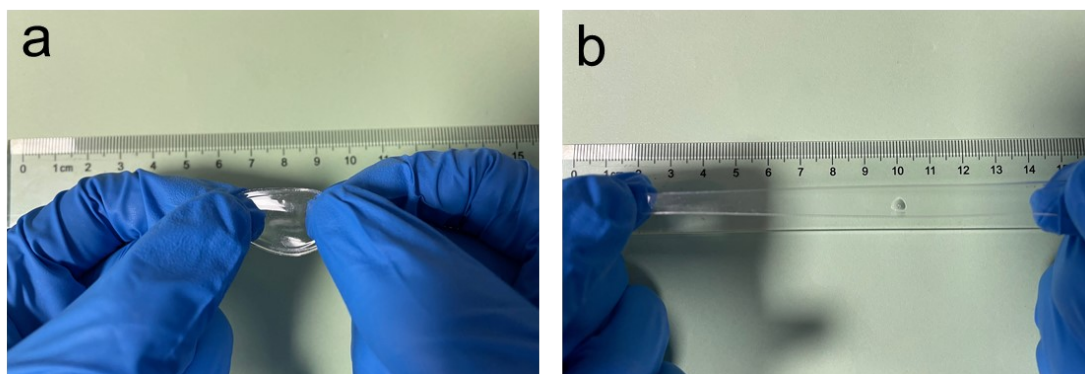

**Fig. S24** Digital photos of the elastic PAM gel electrolyte, showing the splendid elasticity.

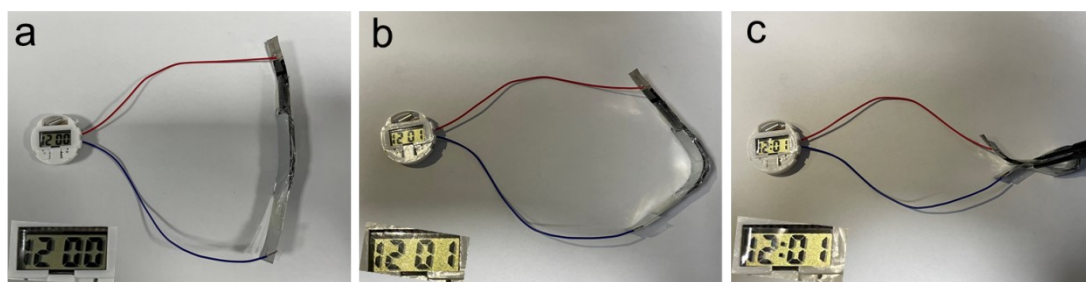

**Fig. S25** Digital photos of a ZIB cell powering an electronic watchband under (a) flat, (b) bending 90° and (c) bending 180° conditions.

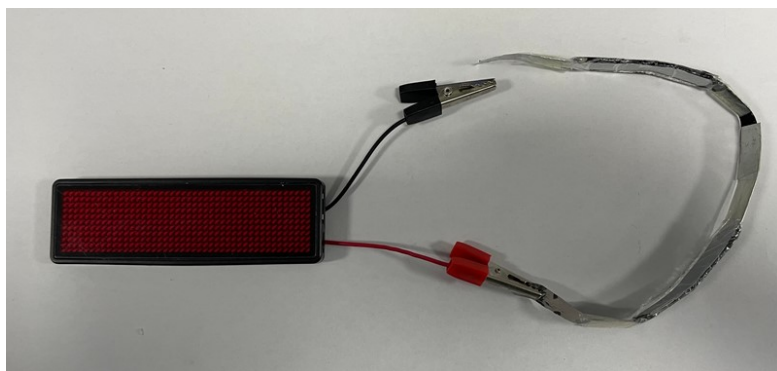

**Fig. S26** LED display screen before connection with the ZIB cells.

**Table S1** The comparison of CPC and average CE with other reported literatures.

| Electrode or electrolyte                                          | Current density (mA cm <sup>-2</sup> ) | Average CE (%) | CPC (mAh cm <sup>-2</sup> ) | Reference |
|-------------------------------------------------------------------|----------------------------------------|----------------|-----------------------------|-----------|
| Zn-PA@Zn                                                          | 2                                      | 99.9           | 800                         | This work |
| ZnO-3D@Zn                                                         | 2                                      | 99.5           | 150                         | 2         |
| ZnS@Zn                                                            | 2                                      | 99.2           | 200                         | 3         |
| Zn(ClO <sub>4</sub> ) <sub>2</sub> ·6H <sub>2</sub> O electrolyte | 0.5                                    | 98.4           | 45                          | 4         |
| Zn(TFSI) <sub>2</sub> -TFEP@MOF@Zn                                | 0.5                                    | 99.9           | 175                         | 5         |
| Antisolvents                                                      | 1                                      | 99.7           | 450                         | 6         |
| Glucose Additive                                                  | 1                                      | 97.2           | 100                         | 7         |
| CNG@Zn                                                            | 0.5                                    | 99.4           | 150                         | 8         |

**Table S2** The CPC comparison of Zn-PA@Zn symmetric cell with other reported literature.

| Electrode or electrolyte                                                   | Current density (mA cm <sup>-2</sup> ) | Areal capacity per cycle (mAh cm <sup>-2</sup> ) | CPC (Ah cm <sup>-2</sup> ) | Reference |
|----------------------------------------------------------------------------|----------------------------------------|--------------------------------------------------|----------------------------|-----------|
| Zn-PA@Zn                                                                   | 5                                      | 1.25                                             | 1.25                       | This work |
| ZnO-3D@Zn                                                                  | 5                                      | 1.25                                             | 1.25                       | 2         |
| TiO <sub>2</sub> @Zn                                                       | 2                                      | 2                                                | 0.28                       | 9         |
| Kaolin@Zn                                                                  | 4.4                                    | 1.1                                              | 1.76                       | 10        |
| Polyamide@Zn                                                               | 0.5                                    | 0.25                                             | 2                          | 11        |
| ZnS@Zn                                                                     | 2                                      | 2                                                | 1.1                        | 3         |
| CNG@Zn                                                                     | 1                                      | 0.5                                              | 1.5                        | 8         |
| Zn(OTF) <sub>2</sub> -<br>Zn(NO <sub>3</sub> ) <sub>2</sub><br>electrolyte | 0.5                                    | 0.5                                              | 0.3                        | 12        |
| Polyimide@Zn                                                               | 4                                      | 2                                                | 1.7                        | 13        |
| Zn <sub>3</sub> (PO <sub>4</sub> ) <sub>2</sub> @Zn                        | 0.5                                    | 99.4                                             | 150                        | 14        |

## References

1. Y. Zeng, X. Zhang, R. Qin, X. Liu, P. Fang, D. Zheng, Y. Tong and X. Lu, *Adv. Mater.*, 2019, **31**, 1903675.
2. X. Xie, S. Liang, J. Gao, S. Guo, J. Guo, C. Wang, G. Xu, X. Wu, G. Chen and J. Zhou, *Energy Environ. Sci.*, 2020, **13**, 503-510.
3. J. Hao, B. Li, X. Li, X. Zeng, S. Zhang, F. Yang, S. Liu, D. Li, C. Wu and Z. Guo, *Adv. Mater.*, 2020, **32**, 2003021.
4. W. Yang, X. Du, J. Zhao, Z. Chen, J. Li, J. Xie, Y. Zhang, Z. Cui, Q. Kong, Z. Zhao, C. Wang, Q. Zhang and G. Cui, *Joule*, 2020, **4**, 1557-1574.
5. L. Cao, D. Li, T. Deng, Q. Li and C. Wang, *Angew. Chem. Int. Ed.*, 2020, **59**, 19292-19296.
6. J. Hao, L. Yuan, C. Ye, D. Chao, K. Davey, Z. Guo and S. Z. Qiao, *Angew. Chem. Int. Ed.*, 2021, **60**, 7366-7375.
7. P. Sun, L. Ma, W. Zhou, M. Qiu, Z. Wang, D. Chao and W. Mai, *Angew. Chem. Int. Ed.*, 2021, **60**, 18247-18255.
8. X. Zhang, J. Li, D. Liu, M. Liu, T. Zhou, K. Qi, L. Shi, Y. Zhu and Y. Qian, *Energy Environ. Sci.*, 2021, **14**, 3120-3129.
9. Q. Zhang, J. Luan, X. Huang, Q. Wang, D. Sun, Y. Tang, X. Ji and H. Wang, *Nat. Commun.*, 2020, **11**, 3961.
10. C. Deng, X. Xie, J. Han, Y. Tang, J. Gao, C. Liu, X. Shi, J. Zhou and S. Liang, *Adv. Funct. Mater.*, 2020, **30**, 2000599.

11. Z. Zhao, J. Zhao, Z. Hu, J. Li, J. Li, Y. Zhang, C. Wang and G. Cui, *Energy Environ. Sci.*, 2019, **12**, 1938-1949.
12. D. Li, L. Cao, T. Deng, S. Liu and C. Wang, *Angew. Chem. Int. Ed.*, 2021, **60**, 13035-13041.
13. M. Zhu, J. Hu, Q. Lu, H. Dong, D. D. Karnaushenko, C. Becker, D. Karnaushenko, Y. Li, H. Tang, Z. Qu, J. Ge and O. G. Schmidt, *Adv. Mater.*, 2021, **33**, 2007497.
14. X. Zeng, J. Mao, J. Hao, J. Liu, S. Liu, Z. Wang, Y. Wang, S. Zhang, T. Zheng, J. Liu, P. Rao and Z. Guo, *Adv. Mater.*, 2021, **33**, 2007416.
